# Supplementary material for: SPR imaging biosensor for determination of laminin-5 as a potential cancer marker in biological material
Source: PubMed Central journal article supplement (PMC4925691; doi:10.1007/s00216-016-9621-x), 2016-05-21

**SPR imaging biosensor for determination of laminin-5 as a potential cancer marker in biological material**

A. Sankiewicz, L. Romanowicz, P. Laudanski, B. Zelazowska-Rutkowska, B. Puzan, B. Cylwik, E. Gorodkiewicz

**Fig.1.** AFM pictures of bare gold (a), cysteamine (b), antibody (c), laminin-5 (d) on the chip.

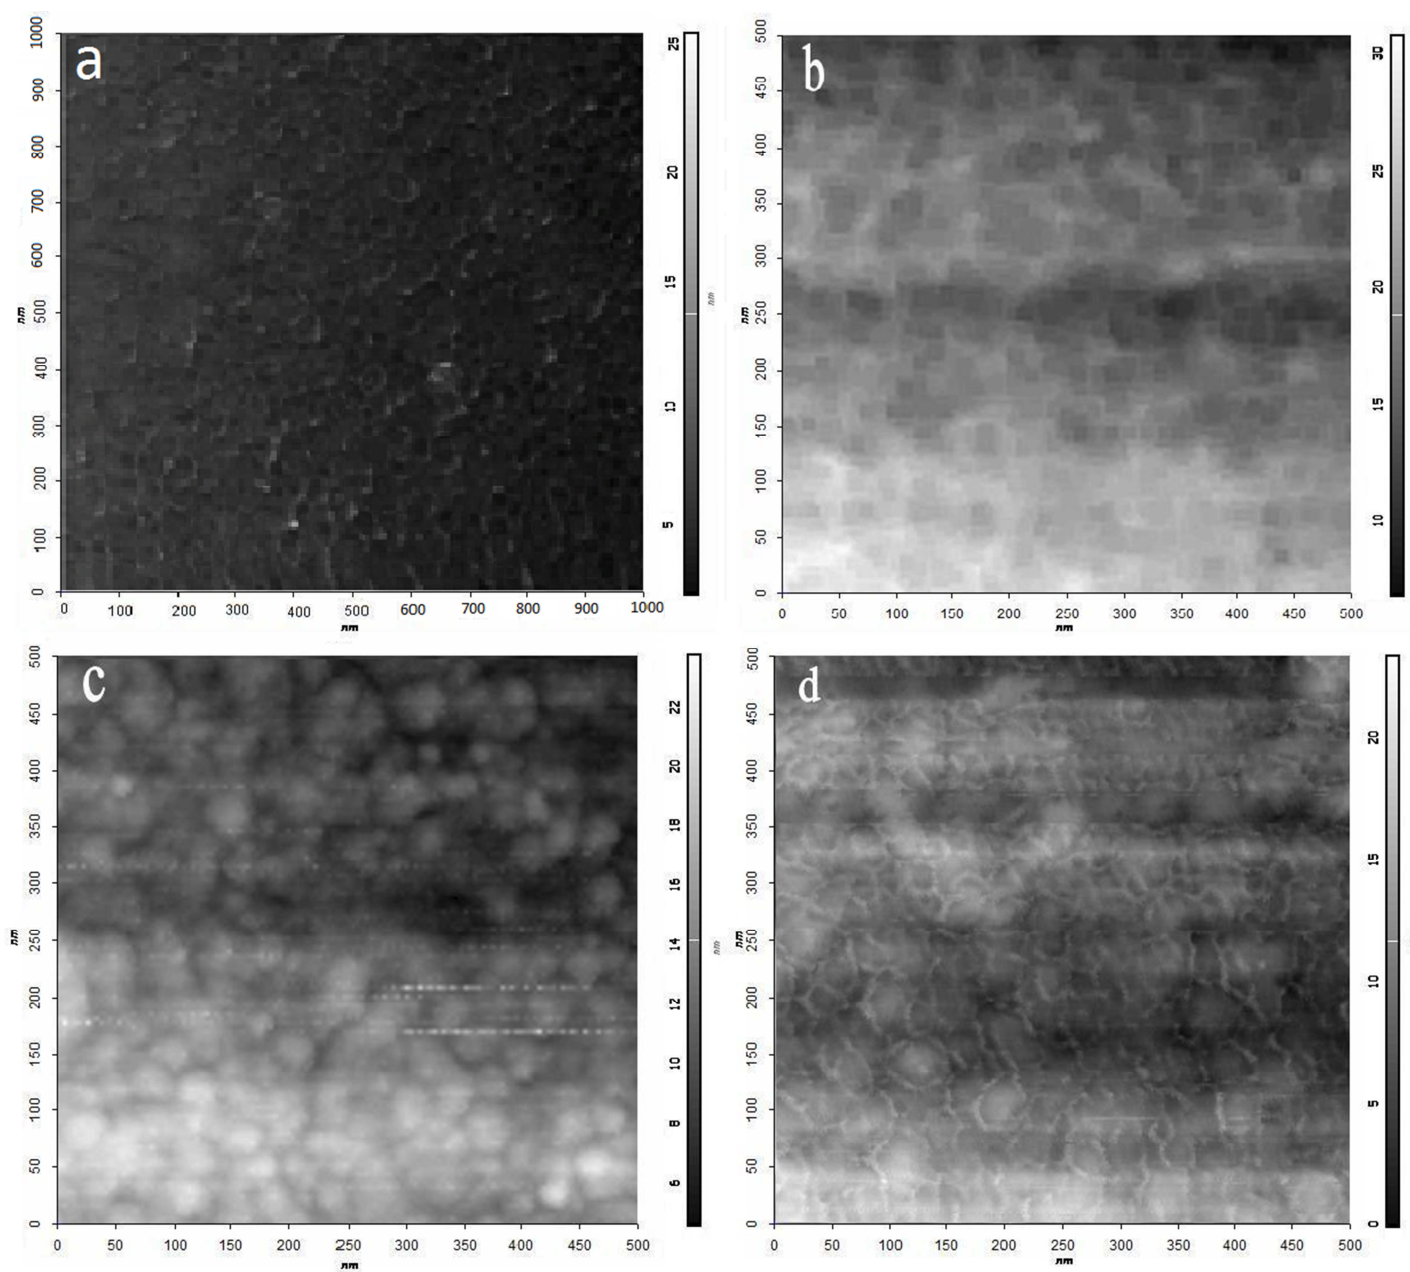

Supplement: 216_2016_9621_MOESM1_ESM.pdf [file 216_2016_9621_MOESM1_ESM.pdf]
